# Supplementary material for: Enteroendocrine cell lineages that differentially control feeding and gut motility
Source: eLife. 2023 Feb 22;12:e78512. doi: 10.7554/eLife.78512 (PMC10032656; doi:10.7554/eLife.78512)
Supplement: Figure 2—source data 1. [file elife-78512-fig2-data1.xlsx]

## Sheet: Sheet1
progenitor	EC 1	EC 2	EC 3	D cells	K cells	I cells	L cells	N cells	X cells
Gvin-ps1.1	Atp6v1c2	Lmo3	Iqsec1	Gm30613	Cnr1	Pzp	Lingo2	Rassf9	Irs4
Myb	Hip1	Foxq1	Trpm2	Hhex	Dlgap2	Habp2	Col8a1	Hs3st2	Tex36
Kcnn4	Cidea	Ctse	Dlg2	Kcnk2	Sphkap	Crp	Ffar1	Adgrd1	Adcy5
Gvin-ps1	Csgalnact1	Fbxl7	Lmx1a	Gm21149	Slfn10-ps	Cyp2j5	Naaladl1	Gm34237	Olfml2b
Kcne3	Alb	Insrr	Slc38a11	Sez6l	Pkib	Adamts5	Gcg	Abcb11	Olfml3
Cdca7	Ankrd55	Hs3st5	Cdk14	Iapp	Plcxd3	Basp1	Tmem108	Sncg	Gm11837
Smoc2	Slc5a9	Gm15218	Ccdc3	Fam151a	Slfn8	Trpm3	Tnr	Rgs6	Tdh
Nhs	Fabp3	Cwh43	Snap25	Asic5	Plcb1	Galnt13	Etv1	Rims3	Gm26862
BC064078	Gm45740	Meis2	Pde4d	Sptbn2	Pdzrn3	Casr	Map2	Gm47833	Hcar2
Cftr	Gstk1	Slc13a3	Tph1	Gm7205	Plxnc1	Ugt8a	Gm34701	Samd11	Plb1
