# Supplementary material for: Enteroendocrine cell lineages that differentially control feeding and gut motility
Source: eLife. 2023 Feb 22;12:e78512. doi: 10.7554/eLife.78512 (PMC10032656; doi:10.7554/eLife.78512)
Supplement: Figure 3—figure supplement 4—source data 1. [file elife-78512-fig3-figsupp4-data1.xlsx]

## Sheet: Figure 3
Figure 3 source
	duodenum													jejunum													ileum													colon
Vil1-Cre; Pet1-FlpE; inter-tdTomato
	animal 1			animal 2			animal 3			animal 4				animal 1			animal 2			animal 3			animal 4				animal 1			animal 2			animal 3			animal 4				animal 1			animal 2			animal 3			animal 4
	tdTomato+	marker antibody+	colocalization	tdTomato+	marker antibody+	colocalization	tdTomato+	marker antibody+	colocalization	tdTomato+	marker antibody+	colocalization		tdTomato+	marker antibody+	colocalization	tdTomato+	marker antibody+	colocalization	tdTomato+	marker antibody+	colocalization	tdTomato+	marker antibody+	colocalization		tdTomato+	marker antibody+	colocalization	tdTomato+	marker antibody+	colocalization	tdTomato+	marker antibody+	colocalization	tdTomato+	marker antibody+	colocalization		tdTomato+	marker antibody+	colocalization	tdTomato+	marker antibody+	colocalization	tdTomato+	marker antibody+	colocalization	tdTomato+
GLP1	1039	72	44	932	95	46	1184	85	56					734	176	130	872	222	175	554	104	77					322	183	142	355	244	211	313	134	105					481	112	96	1128	295	264	1223	166	149
CCK	1148	166	134	1413	78	61	1279	134	111					668	72	60	817	72	56	632	33	24					279	15	14	404	17	15	341	13	8					573	4	4	1700	4	4	1438	2	1
SST	1205	89	54	875	88	67	1150	105	86	1115	79	63		714	21	21	721	24	18	685	12	11	809	11	9		331	19	16	348	28	20	402	22	13					515	2	1	1426	32	30	1191	7	6
Serotonin	1085	941	910	864	785	761	1123	1027	990					616	349	335	773	423	399	604	249	228					253	122	115	366	184	169	344	148	136					515	296	273	1392	861	822	963	463	437
Vil1-Cre; Sst-FlpO; inter-tdTomato
	animal 1			animal 2			animal 3			animal 4				animal 1			animal 2			animal 3			animal 4				animal 1			animal 2			animal 3			animal 4				animal 1			animal 2			animal 3			animal 4
	tdTomato+	marker antibody+	colocalization	tdTomato+	marker antibody+	colocalization	tdTomato+	marker antibody+	colocalization	tdTomato+	marker antibody+	colocalization		tdTomato+	marker antibody+	colocalization	tdTomato+	marker antibody+	colocalization	tdTomato+	marker antibody+	colocalization	tdTomato+	marker antibody+	colocalization		tdTomato+	marker antibody+	colocalization	tdTomato+	marker antibody+	colocalization	tdTomato+	marker antibody+	colocalization	tdTomato+	marker antibody+	colocalization		tdTomato+	marker antibody+	colocalization	tdTomato+	marker antibody+	colocalization	tdTomato+	marker antibody+	colocalization	tdTomato+
GLP1	178	72	0	116	107	0	83	50	0	80	35	0		59	145	0	49	117	0	38	134	0	38	143	0		32	222	0	63	246	0	24	155	0	28	141	1		90	299	3	82	300	1
CCK	176	192	0	99	321	0	93	233	0	85	202	0		51	7	0	42	20	0	44	104	0	28	120	0		30	1	0	38	1	0	23	17	0	22	19	0		101	16	0	79	41	0
SST	113	119	109	90	106	90	102	122	102	101	120	100		37	20	18	26	7	7	40	43	38	39	37	37		19	7	7	29	17	13	20	23	18	26	26	24		92	74	74	83	71	70
Serotonin	146	1457	0	94	1493	0	88	908	0	93	931	1		48	389	0	40	298	0	42	417	0	34	376	0		36	196	0	47	184	0	24	137	0	30	133	0		72	675	0	65	709	1
Gip-Cre; Vil1-FlpO; inter-tdTomato
	animal 1			animal 2			animal 3			animal 4				animal 1			animal 2			animal 3			animal 4				animal 1			animal 2			animal 3			animal 4				animal 1			animal 2			animal 3			animal 4
	tdTomato+	marker antibody+	colocalization	tdTomato+	marker antibody+	colocalization	tdTomato+	marker antibody+	colocalization	tdTomato+	marker antibody+	colocalization		tdTomato+	marker antibody+	colocalization	tdTomato+	marker antibody+	colocalization	tdTomato+	marker antibody+	colocalization	tdTomato+	marker antibody+	colocalization		tdTomato+	marker antibody+	colocalization	tdTomato+	marker antibody+	colocalization	tdTomato+	marker antibody+	colocalization	tdTomato+	marker antibody+	colocalization		tdTomato+	marker antibody+	colocalization	tdTomato+	marker antibody+	colocalization	tdTomato+	marker antibody+	colocalization	tdTomato+
GLP1	199	97	0	241	132	3	146	71	0	154	48	1		198	125	0	190	119	0	131	136	0	184	155	0		7	127	3	2	23	0	3	63	0	3	85	0		2	66	0	0			0			0
CCK	179	193	6	174	194	8	120	173	3	140	99	2		170	11	0	131	19	0	138	31	0	164	84	0		3	0	0	5	0	0	0			0				0			0			0			0
SST	149	95	3	163	116	10	104	85	4	115	58	1		170	40	3	163	42	4	136	49	0	176	60	5		8	24	0	1	12	0	0			0				0			0			0			0
Serotonin	154	655	2	162	868	1	116	631	1	119	515	0		171	261	0	139	196	1	108	210	0	158	229	0		7	169	0	7	119	0	3	97	0	0	98	0		0			0			0			0
Cck-Cre; Vil1-FlpO; inter-tdTomato
	animal 1			animal 2			animal 3			animal 4				animal 1			animal 2			animal 3			animal 4				animal 1			animal 2			animal 3			animal 4				animal 1			animal 2			animal 3			animal 4
	tdTomato+	marker antibody+	colocalization	tdTomato+	marker antibody+	colocalization	tdTomato+	marker antibody+	colocalization	tdTomato+	marker antibody+	colocalization		tdTomato+	marker antibody+	colocalization	tdTomato+	marker antibody+	colocalization	tdTomato+	marker antibody+	colocalization	tdTomato+	marker antibody+	colocalization		tdTomato+	marker antibody+	colocalization	tdTomato+	marker antibody+	colocalization	tdTomato+	marker antibody+	colocalization	tdTomato+	marker antibody+	colocalization		tdTomato+	marker antibody+	colocalization	tdTomato+	marker antibody+	colocalization	tdTomato+	marker antibody+	colocalization	tdTomato+
GLP1	290	67	45	379	78	63	375	78	53	516	53	31		396	133	90	405	157	101	306	125	75	630	116	28		239	155	113	247	126	84	278	125	53					560	308	138	480	330	299	486	360	283
CCK	413	108	104	274	180	155	309	167	152	390	263	236		362	6	6	271	75	60	320	102	90	352	79	66		242	13	12	236	8	8								288	0	0	511	10	9	627	11	8
SST	410	114	29	396	126	20	436	51	16					386	18	3	343	16	3	398	10	1					216	10	4	199	6	1								450	24	14	588	22	6	394	7	2
Serotonin	506	638	72	369	708	79	404	799	98					480	230	27	342	191	38	304	116	35					246	98	38	264	87	43								548	369	3	462	466	4	619	518	5
Gcg-Cre; Vil1-FlpO; inter-tdTomato
	animal 1			animal 2			animal 3			animal 4				animal 1			animal 2			animal 3			animal 4				animal 1			animal 2			animal 3			animal 4				animal 1			animal 2			animal 3			animal 4
	tdTomato+	marker antibody+	colocalization	tdTomato+	marker antibody+	colocalization	tdTomato+	marker antibody+	colocalization	tdTomato+	marker antibody+	colocalization		tdTomato+	marker antibody+	colocalization	tdTomato+	marker antibody+	colocalization	tdTomato+	marker antibody+	colocalization	tdTomato+	marker antibody+	colocalization		tdTomato+	marker antibody+	colocalization	tdTomato+	marker antibody+	colocalization	tdTomato+	marker antibody+	colocalization	tdTomato+	marker antibody+	colocalization		tdTomato+	marker antibody+	colocalization	tdTomato+	marker antibody+	colocalization	tdTomato+	marker antibody+	colocalization	tdTomato+
GLP1	114	43	37	106	41	31	97	37	24					235	44	30	274	53	35	278	51	35					186	79	74	183	62	55	187	78	67					483	221	211	490	159	153
CCK	115	116	39	131	114	44	88	121	39					217	2	0	244	1	1	251	2	1					181	0	0	162	0	0	171	0	0					359	0	0	351	0	0
SST	91	57	0	107	85	0	74	73	0					210	8	0	219	3	0	258	5	0					220	8	3	155	1	0	151	4	1					379	5	2	492	7	2
Serotonin	104	422	8	123	604	5	100	548	10					188	167	0	211	166	0	216	209	1					189	78	0	155	44	1	159	63	2					305	276	0	397	330	0
[truncated: 14 more columns]
