# Supplementary material for: Enteroendocrine cell lineages that differentially control feeding and gut motility
Source: eLife. 2023 Feb 22;12:e78512. doi: 10.7554/eLife.78512 (PMC10032656; doi:10.7554/eLife.78512)
Supplement: Figure 4—source data 1. [file elife-78512-fig4-data1.xlsx]

## Sheet: Figure 4
Figure 4 source
	NeuroD1		Ptf1a		Pet1		Tac1		Npy1r		Sst		Gip		Cck		Gcg
	Cre -	Cre +	Cre -	Cre +	Cre -	Cre +	Cre -	Cre +	Cre -	Cre +	Cre -	Cre +	Cre -	Cre +	Cre -	Cre +	Cre -	Cre +
	23	34	21	18	23	27	23	36	29	27	21	36	17	25	12	8	22	10
	28	27	27.5	25	23	27	18	31	23	10	26	16	19	25	27	6	19	10
	26	26	26	23	17	30	19	38	30	16	11	25	23	22	25	7	25	7
	30	24	30	37	21	31	24	32	29	26	27	26	24	24	18.5	7.5	21	5
	17	25	27	25	21	33	23	38.5	20	28	11	30	27	20	25	7	21	9
	18	33	15	16	17	29	19	36	17	21	20	27					29	9
	23	23	16	13	26	18		42	30	23	14	21					13	7
	27	30	20	24	29	35			16	20	18	26					29	6
	21	33				35				25.5	17	18.5
	25	38				33					15	29
	21	38									24	10.5
	16	39									22	29
	19	26																	female
		35																	male
# of animals (n)	13	14	8	8	8	10	6	7	8	9	12	12	5	5	5	5	8	8
# of independent experiments combined	3		3		4		3		3		3		2		1		4
