# Supplementary material for: Enteroendocrine cell lineages that differentially control feeding and gut motility
Source: eLife. 2023 Feb 22;12:e78512. doi: 10.7554/eLife.78512 (PMC10032656; doi:10.7554/eLife.78512)
Supplement: Figure 5—figure supplement 1—source data 1. [file elife-78512-fig5-figsupp1-data1.xlsx]

## Sheet: Figure 5 - figure supplement 1
Figure 5 - figure supplement 1 source
	Tac1		Npy1r			Ptf1a		Sst		Gip		Cck
	Cre -	Cre +	Cre -	Cre +		Cre -	Cre +	Cre -	Cre +	Cre -	Cre +	Cre -	Cre +
	1.5	0.66	0.37	0.16		0.54	0.17	0.14	0.02	0.71	0.4	0.57	0.22
	1.15	0.72	0.99	0.34		0.72	0.46	0.15	0.71	0.49	0.34	0.24	0
	1.07	0.77	1.07	0.26		0.16	0.34	0.02	0.43	0.57	0.35	0.4	0.2
	1.4	0.54	1.47	0.32		0.25	0.37	0.02	0.34	0.18	0.64	0.61	0.02
		0.59	1.12	0.02		0.52	0.37	0.17	0.51		0.61	0.64	0.25
		0.88	1.14	0.13		0.2	0.1	0.29	0.39		0.61	0.54	0.24
		0.47				0.3	0.31	0.61	0.35			0.57	0.52
						0.4	0.27	0.7	0.74			0.55	0.18
						0.55	0.42	0.19				0.75	0.33
							0.14						0.47
							0.15							female
							0.36							male
# of animals (n)	4	7	6	6		9	12	9	8	4	6	9	10
# of independent experiments combined	2		3			3		1		2		3
