# Supplementary material for: Enteroendocrine cell lineages that differentially control feeding and gut motility
Source: eLife. 2023 Feb 22;12:e78512. doi: 10.7554/eLife.78512 (PMC10032656; doi:10.7554/eLife.78512)
Supplement: Figure 5—source data 1. [file elife-78512-fig5-data1.xlsx]

## Sheet: Figure 5
Figure 5 source
	NeuroD1		Ptf1a		Pet1		Sst		Gip		Cck		Gcg
	Cre -	Cre +	Cre -	Cre +	Cre -	Cre +	Cre -	Cre +	Cre -	Cre +	Cre -	Cre +	Cre -	Cre +
	1.07	0.99	0.9	0.88	0.89	0.66	1.36	1.16	1.21	1.37	1.19	0.75	1.24	0.02
	1.25	0.75	0.82	1.13	0.57	0.48	0.98	0.98	0.62	1.29	0.75	0.58	1.44	0.46
	1.19	0.67	1.01	0.96	0.48	0.34	1.3	0.62	0.57	0.92	0.87	1.07	0.16	0.06
	1.27	0.84	0.99	0.86	0.8	0.49	1.1	0.95	1	1.38	1.2	1.18	1.06	0.01
	0.98	0.72	1.09	1.05	1.16	0.39	1.05	1.2	1.03	1.33	1.16	1.12	1.74	0.66
	0.89	0.98	1.02	0.98	1.35	0.64	1.15	1.03	1.33	1.14	1.27	0.91	1.52	1.41
	1.12	0.7	0.91	0.97	0.93	0.57	1	1.15	0.89	1.53	1.24	0.67	1.53	1.18
	1.17	0.67	1.01	1	0.8	0.56	1.05	0.94	1.11	1.32	0.8	1.06	1.46	0.92
	1.31	0.91	1.11	1.44	1.64	0.03			1.1	0.91	1.46	1.28	1.19	0.65
	0.97	1.06	1	0.95		0.47			1.39	1.24					female
				0.9					0.97	1.1					male
									0.51	0.96
									1.1
# of animals (n)	10	10	10	11	9	10	8	8	13	12	9	9	9	9
# of independent experiments combined	3		3		3		3		4		3		3
