# Supplementary figures and images for: Enteroendocrine cell lineages that differentially control feeding and gut motility
Source: eLife journal article supplement (doi:10.7554/elife.78512), 2023-02-22

**A**

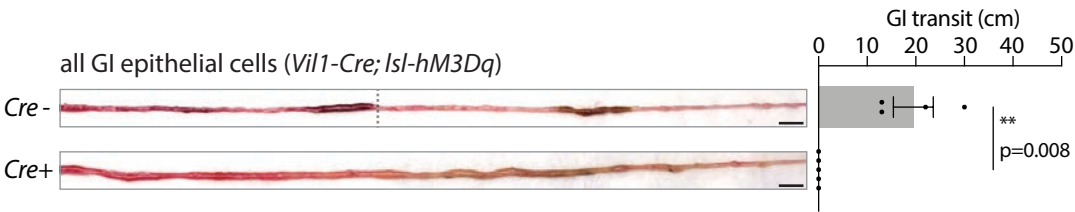

**B**

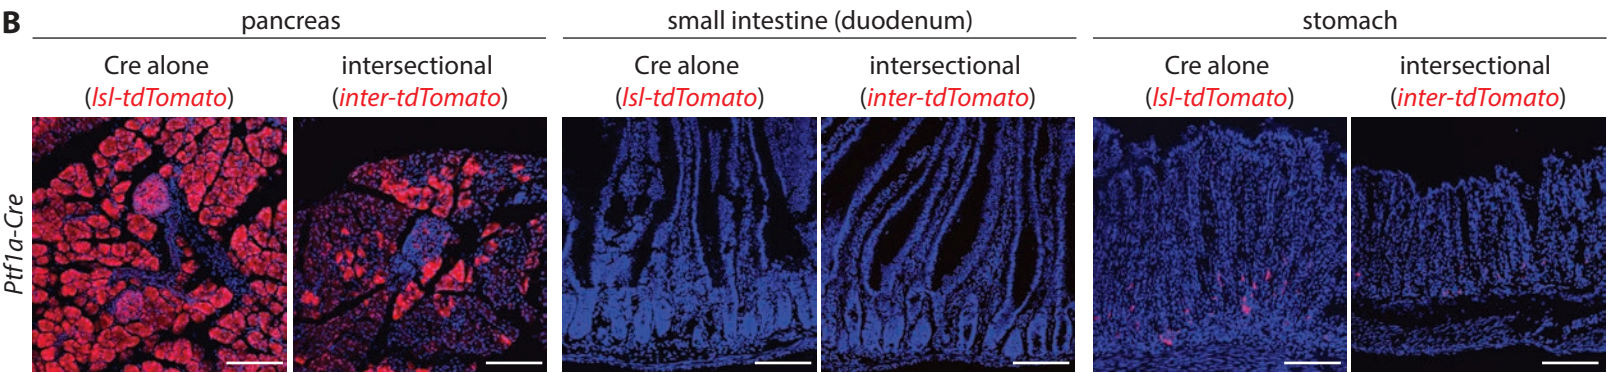

**C**

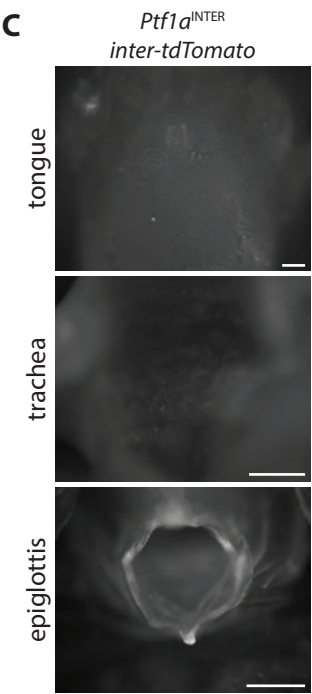

Supplement: supp [file elife-78512-supp-v1.zip]

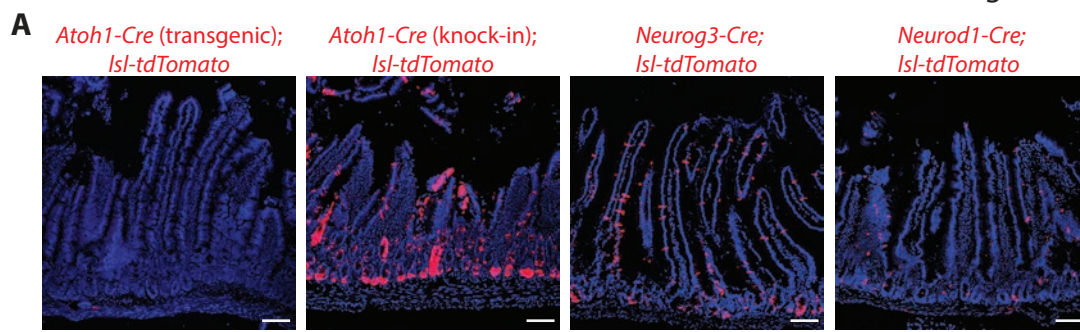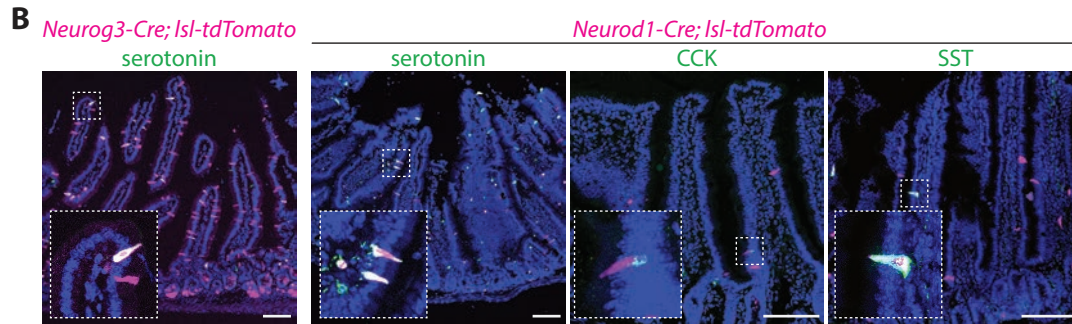

C

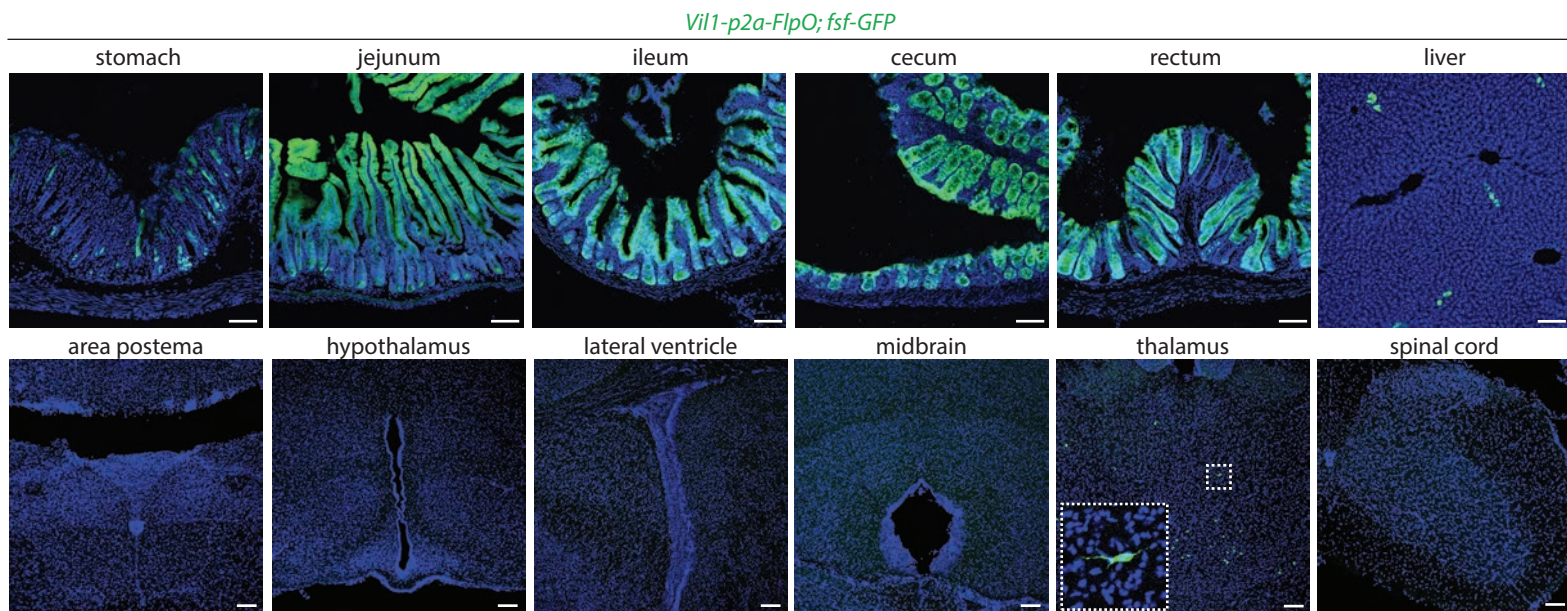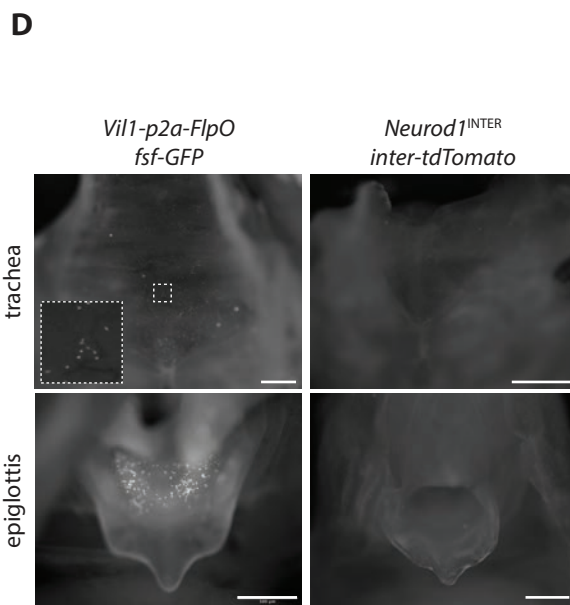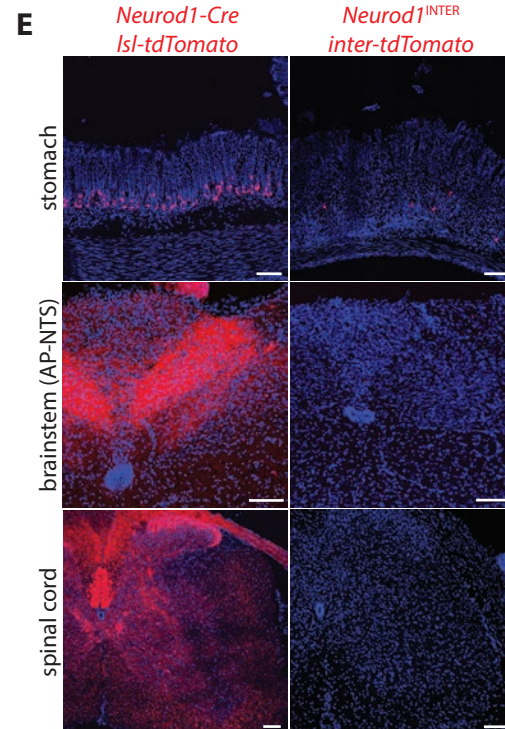

Supplement: supp [file elife-78512-supp-v1.zip]

Figure 3 - figure supplement 1

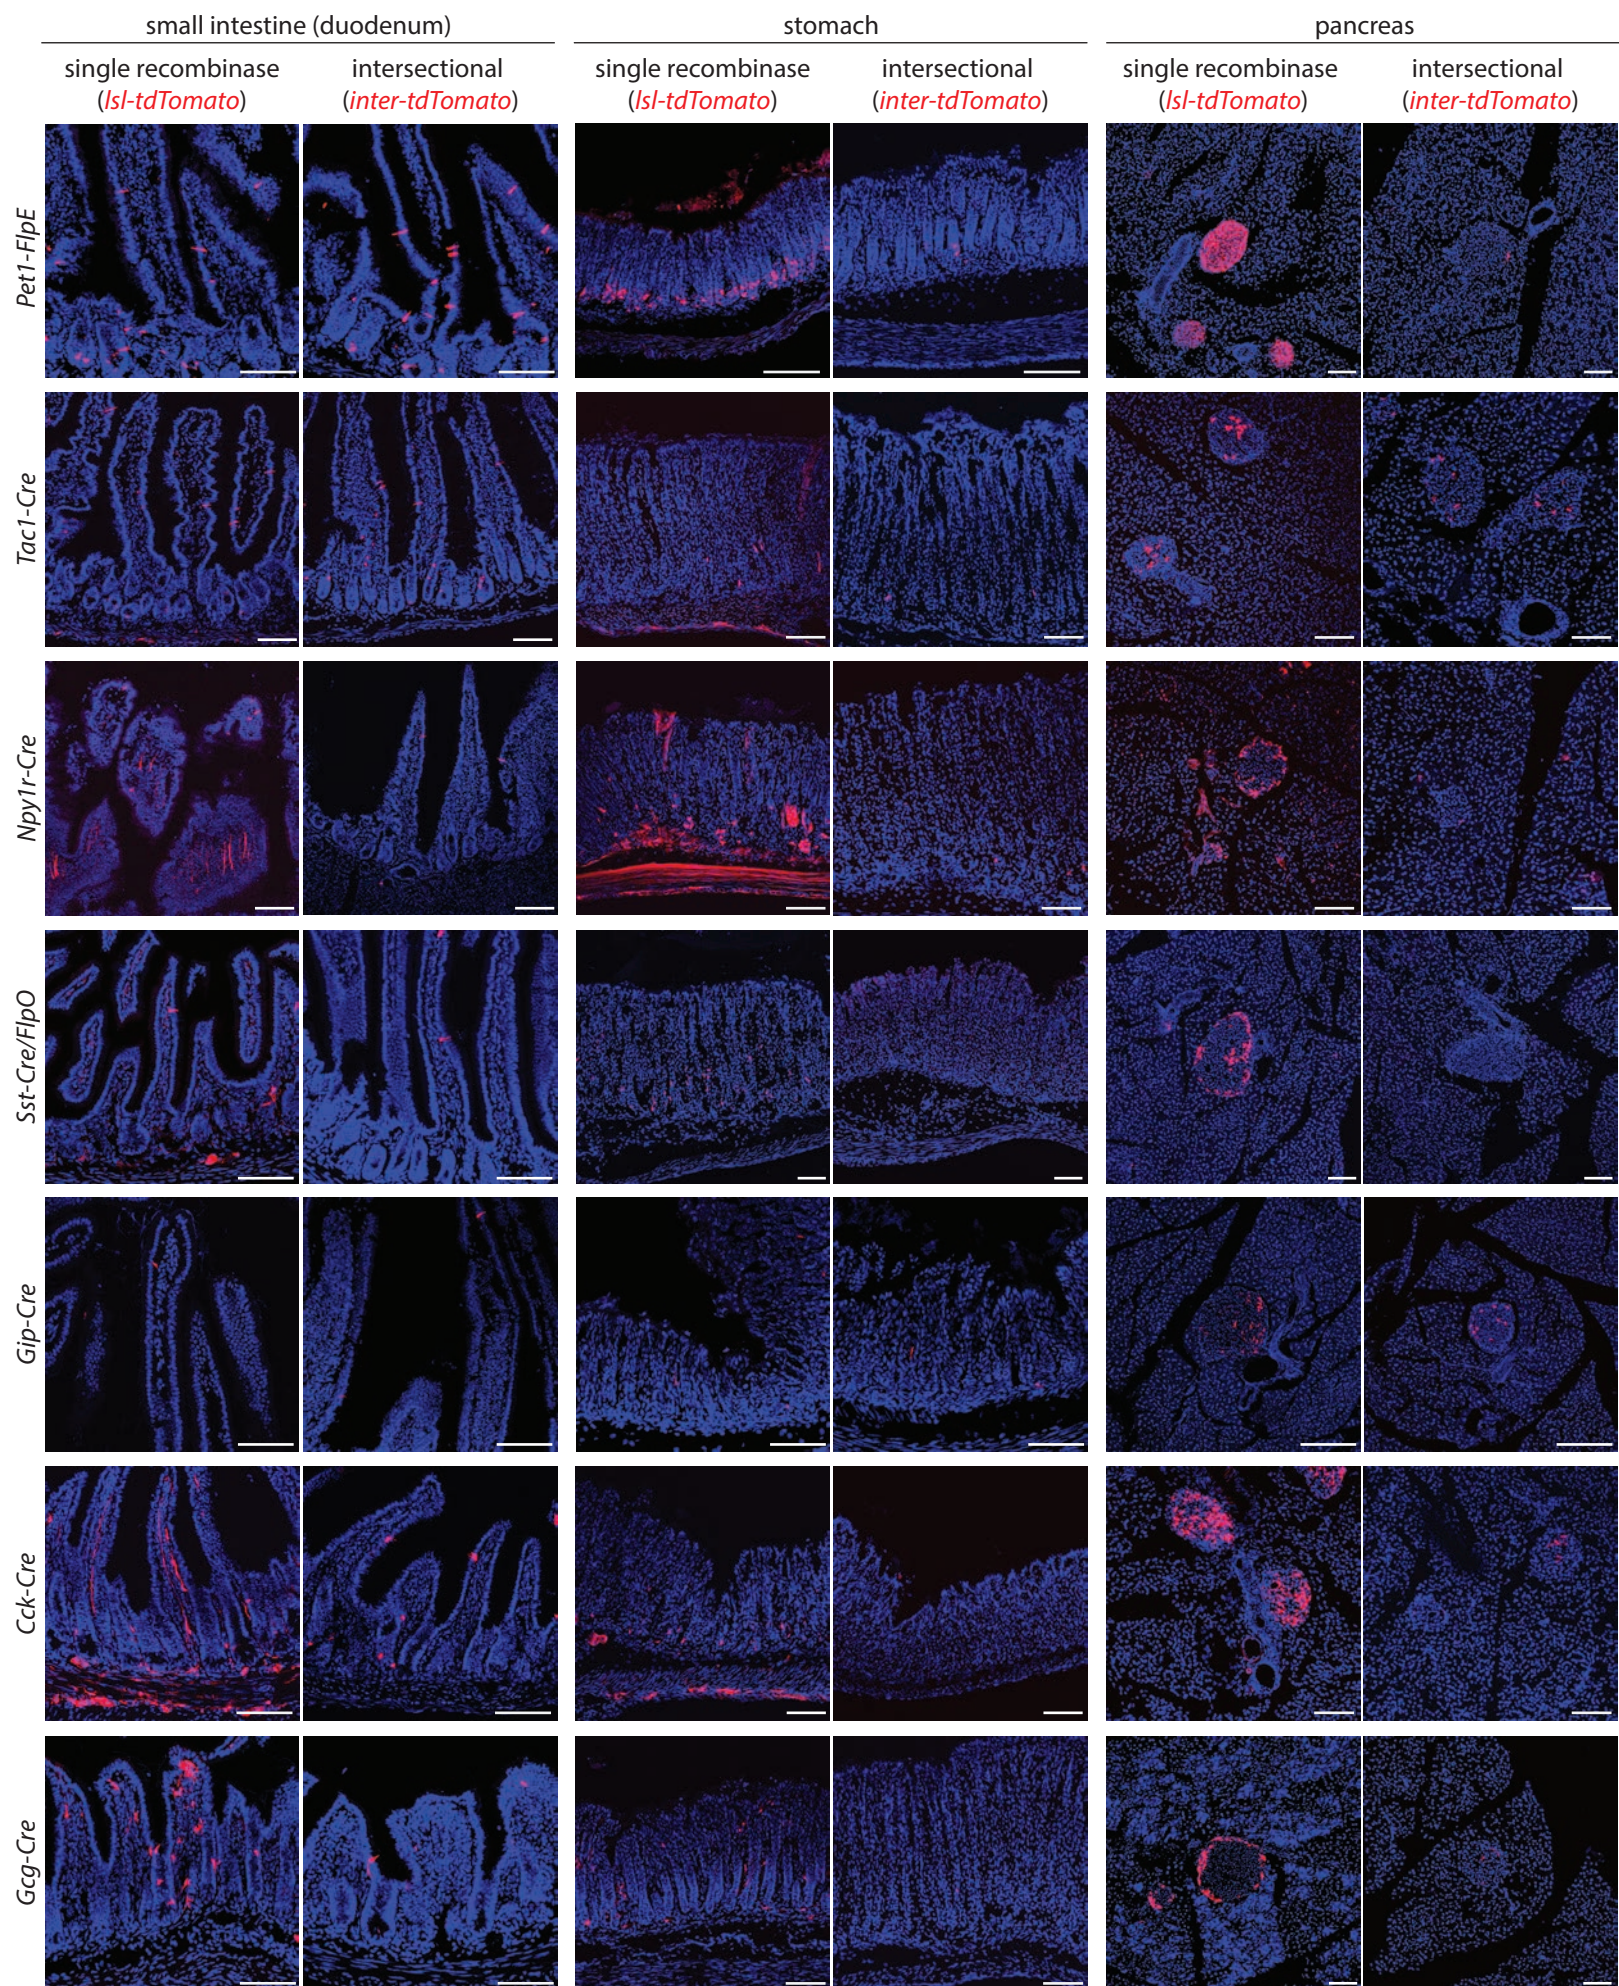

Supplement: supp [file elife-78512-supp-v1.zip]

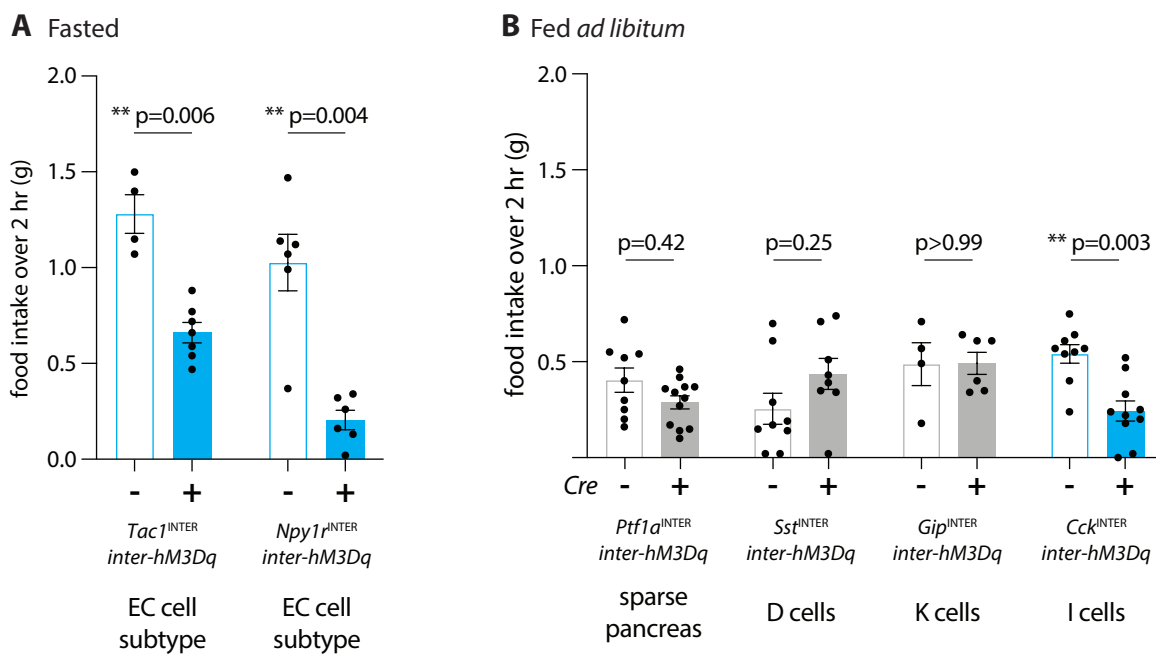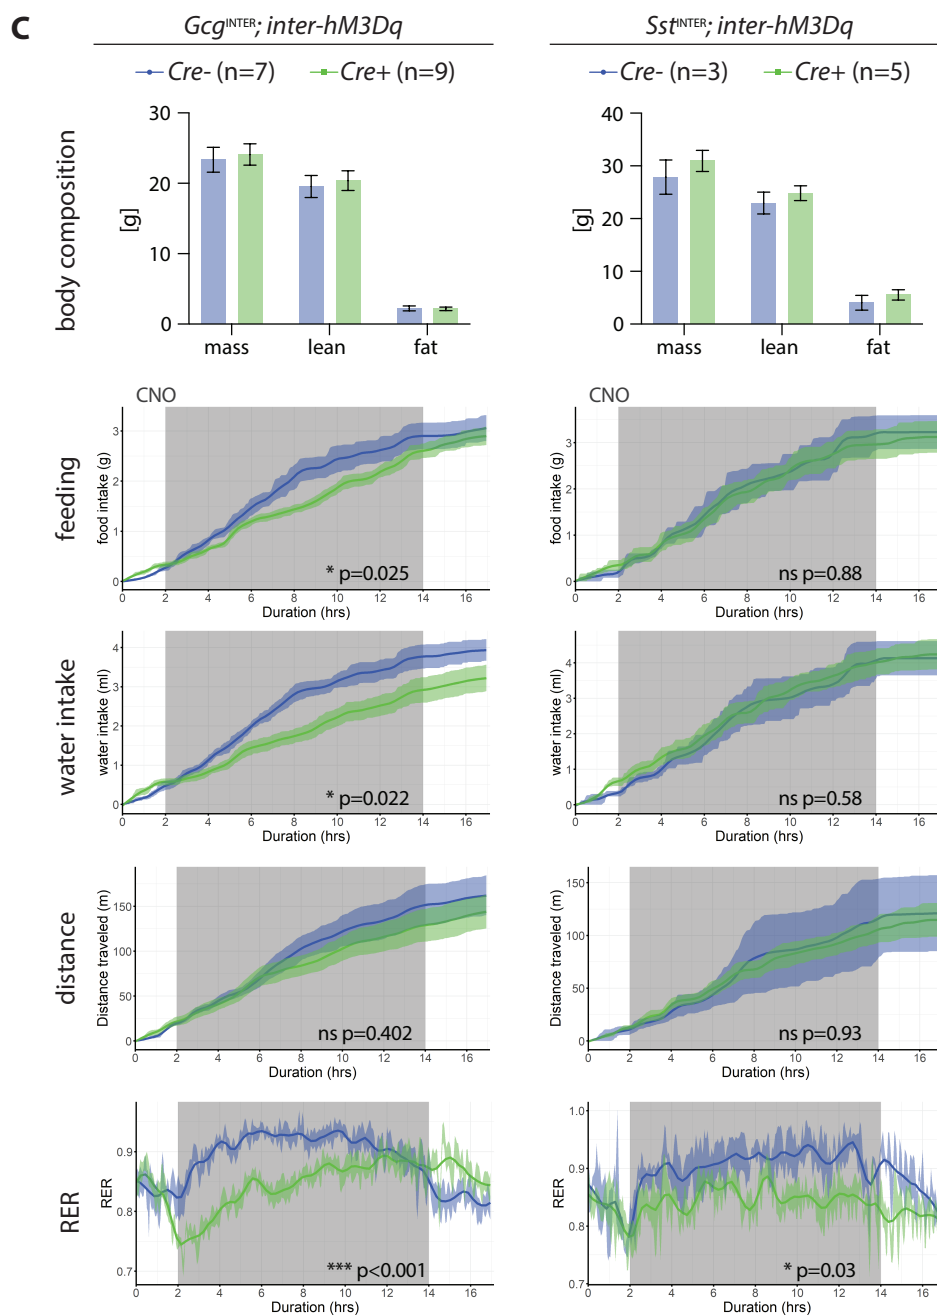

Supplement: supp [file elife-78512-supp-v1.zip]

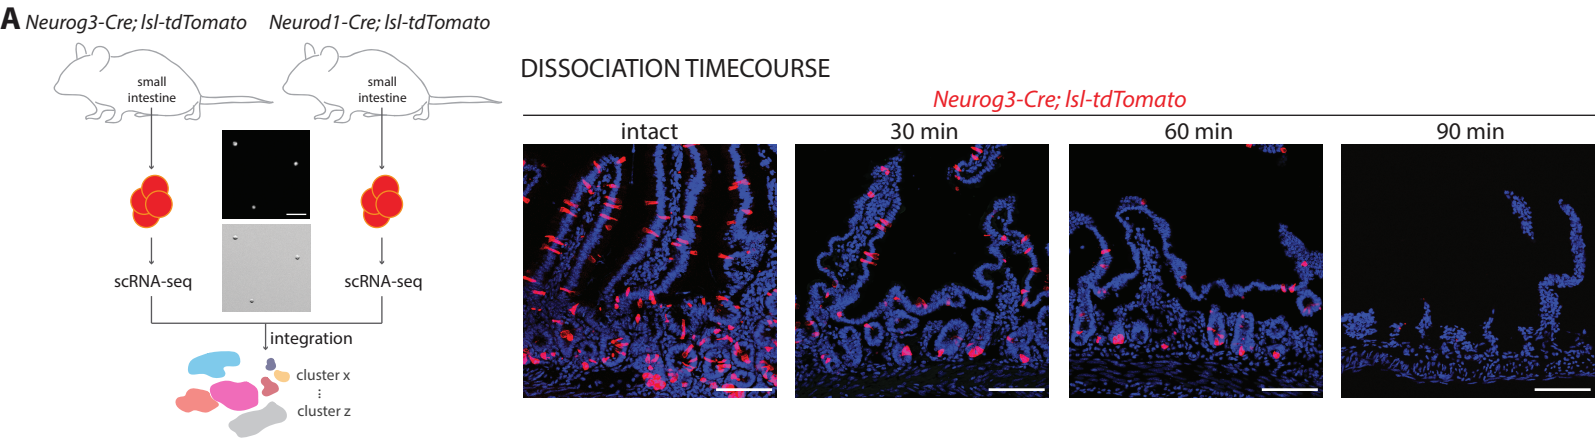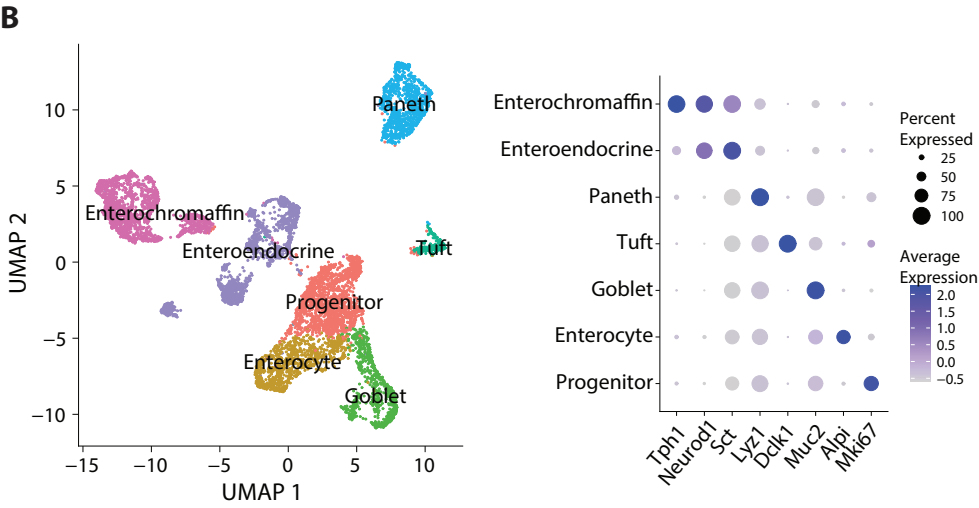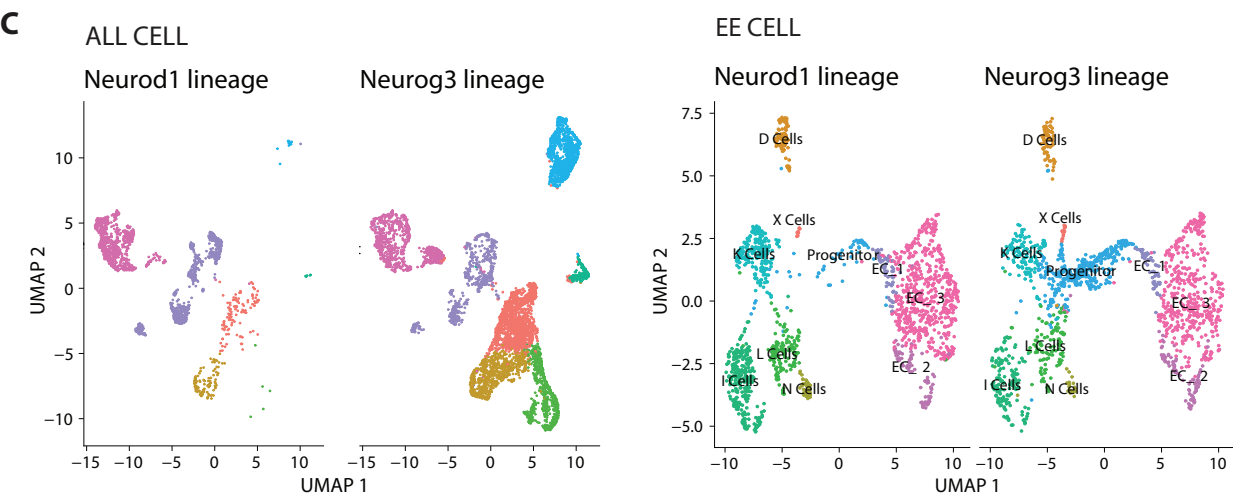

Supplement: supp [file elife-78512-supp-v1.zip]

**A**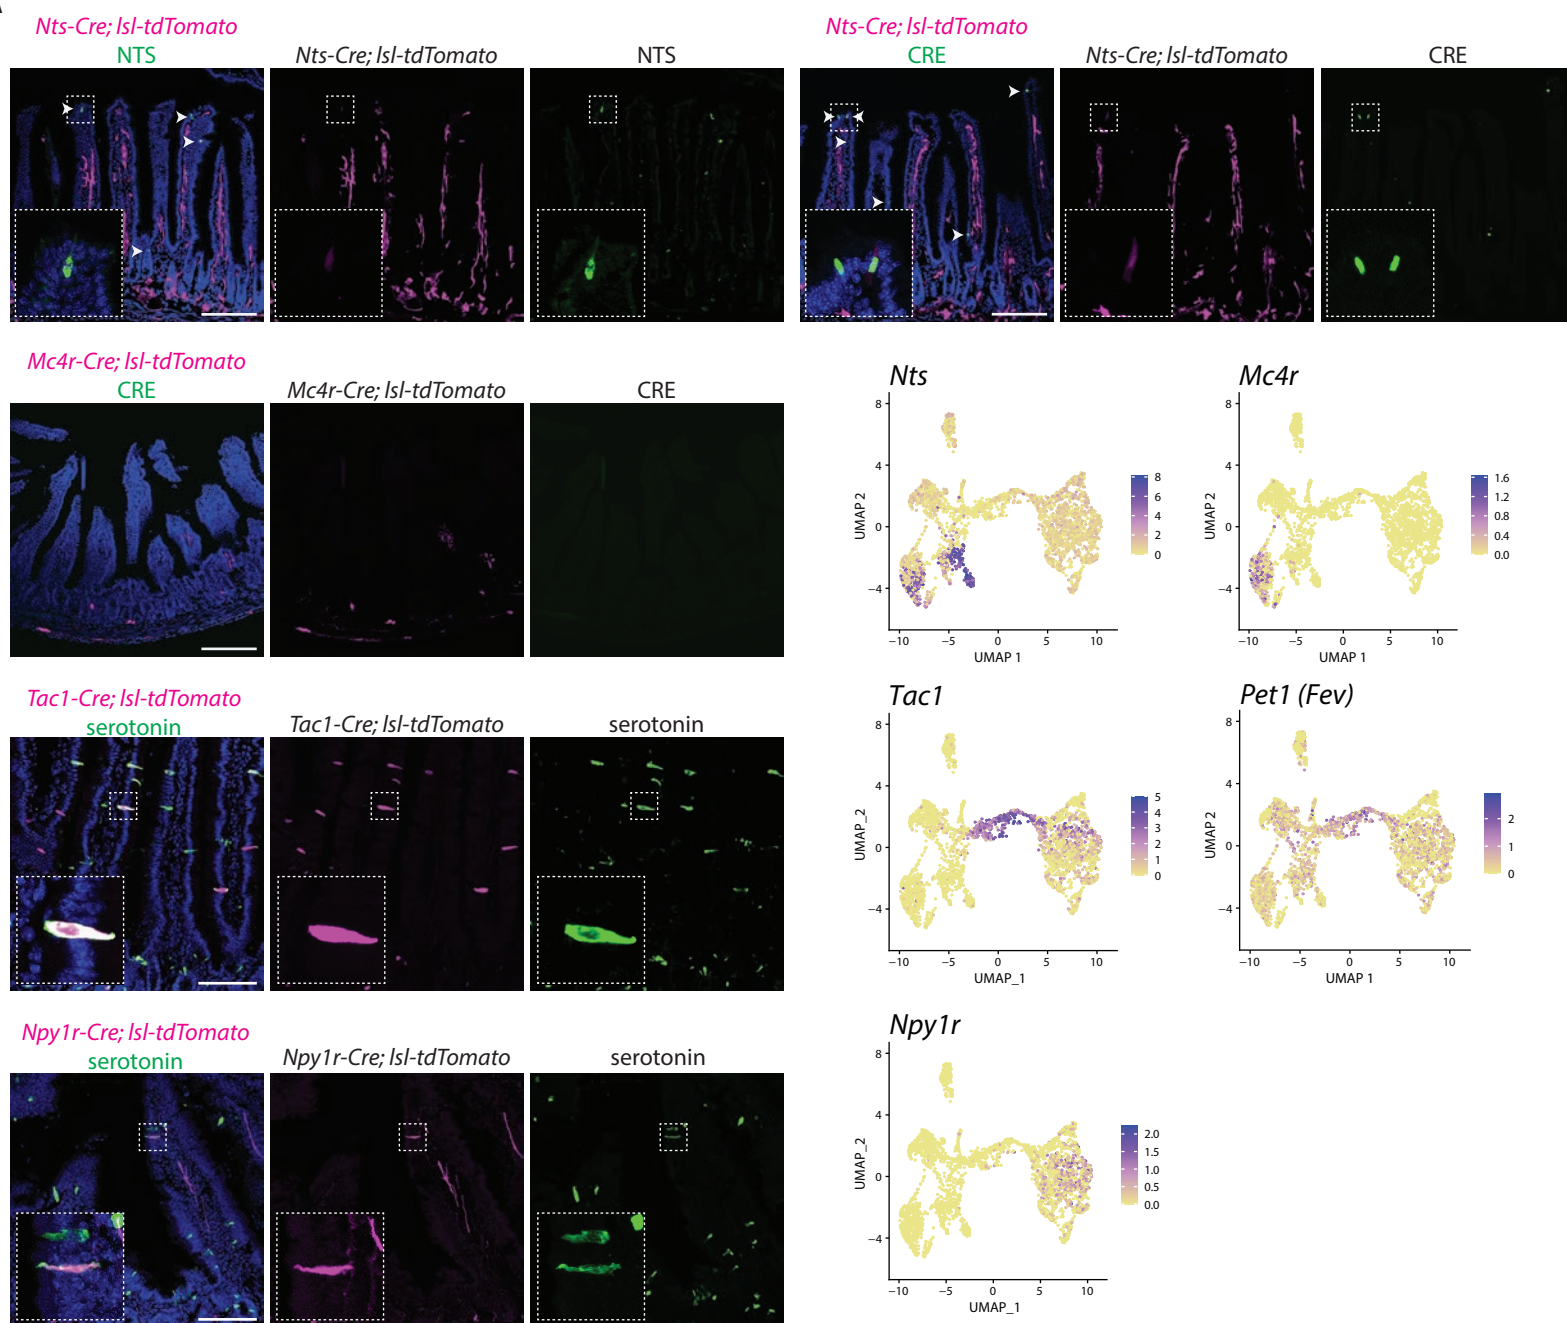**B**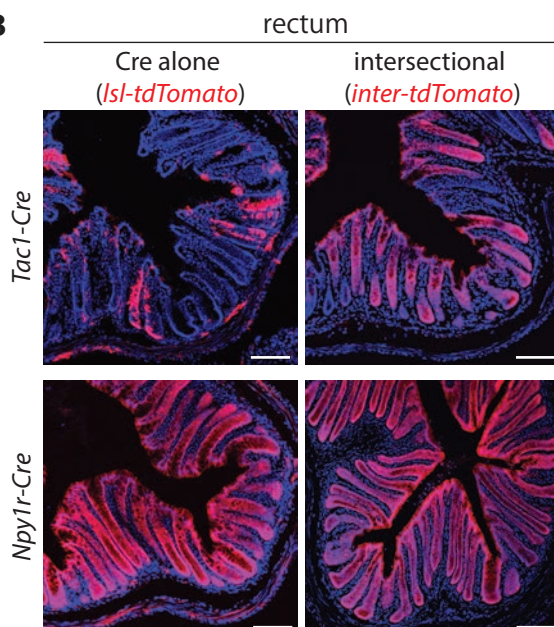

Supplement: supp [file elife-78512-supp-v1.zip]

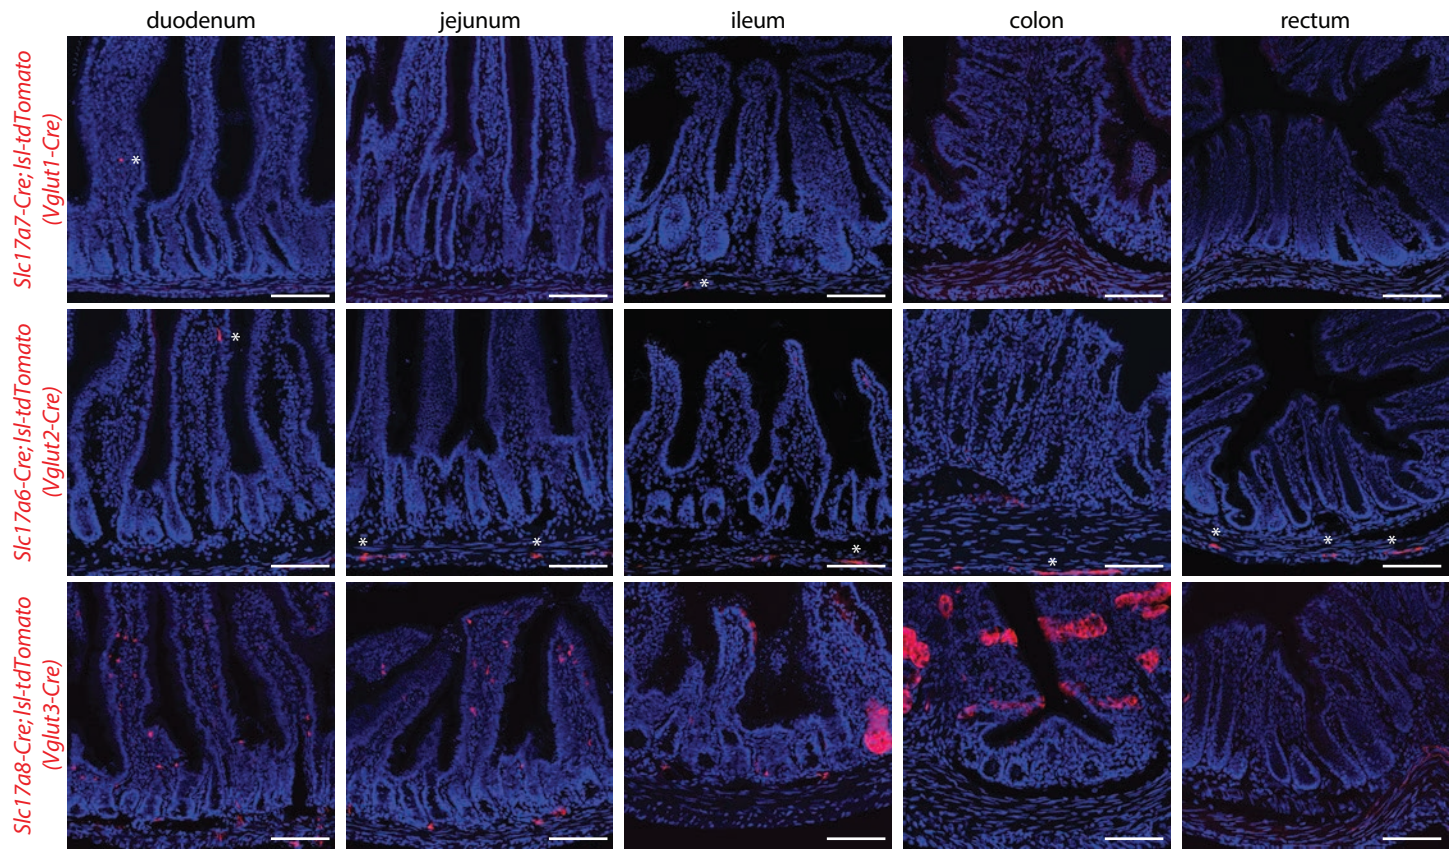

Supplement: supp [file elife-78512-supp-v1.zip]

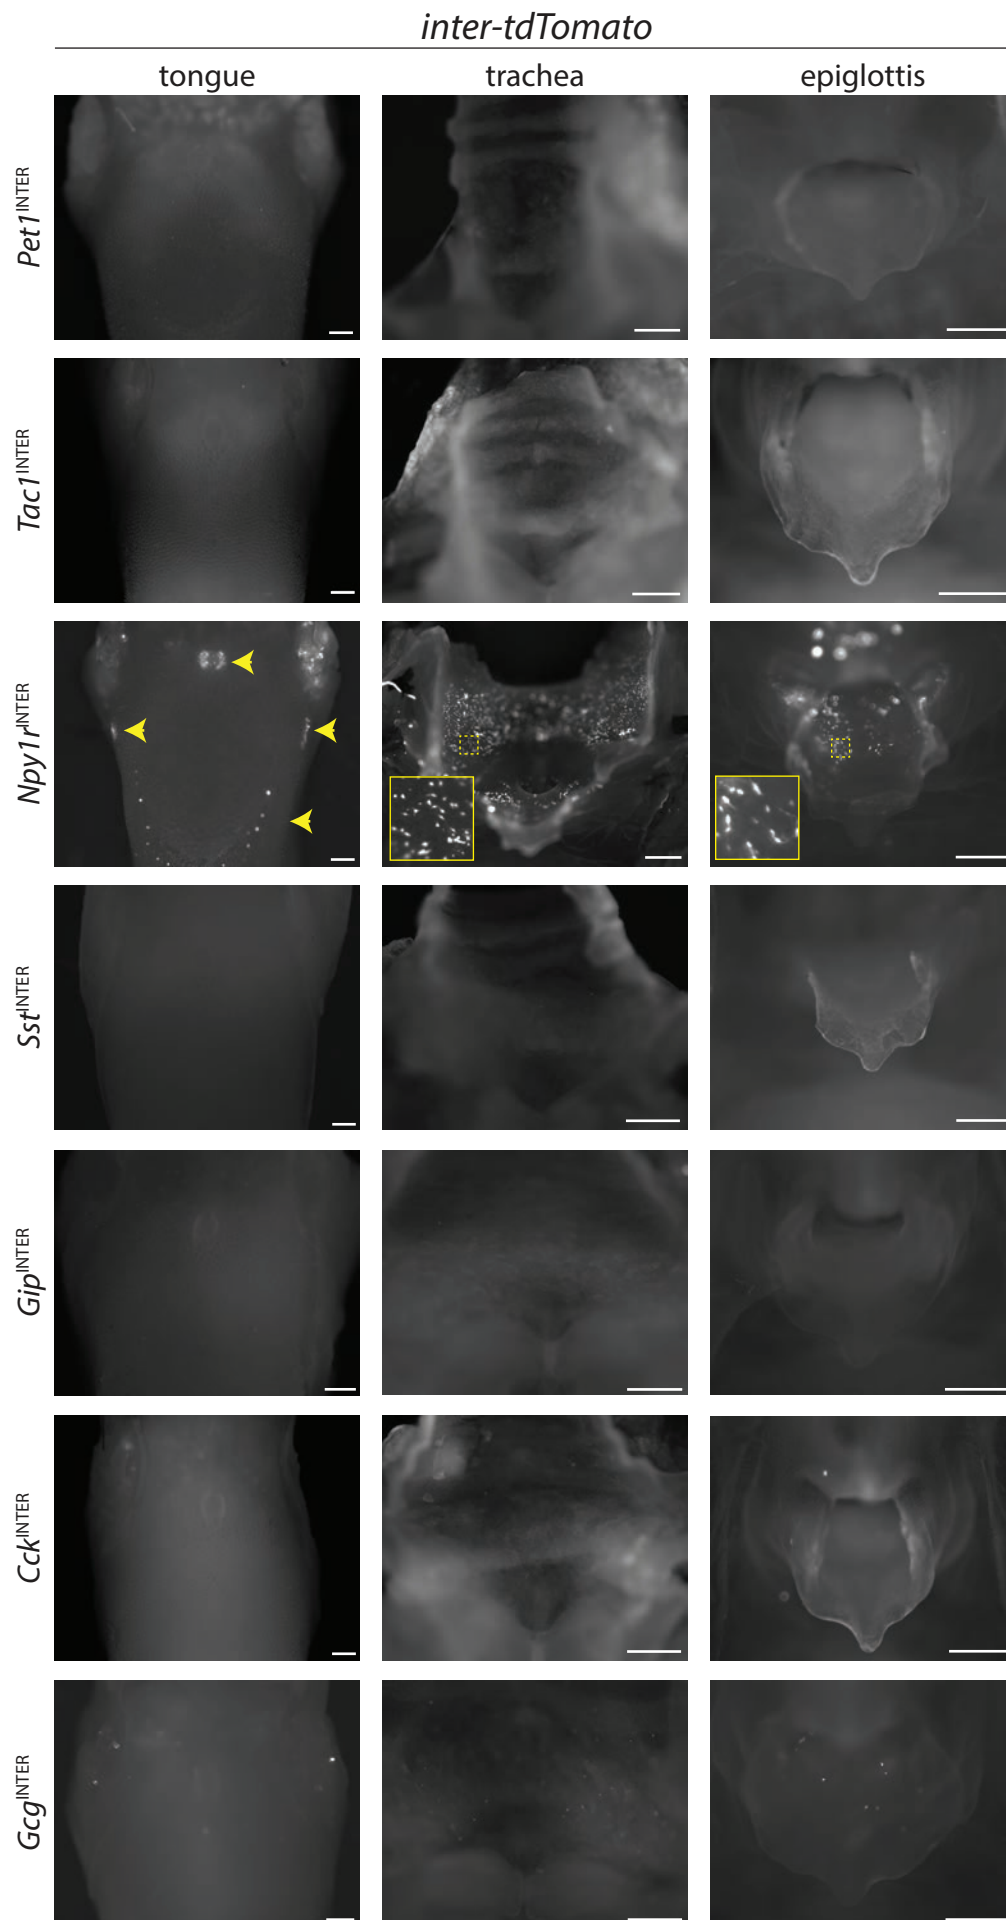

Supplement: supp [file elife-78512-supp-v1.zip]
